# Supplementary material for: Evaluation of a 5-HT2B receptor agonist in a murine model of amyotrophic lateral sclerosis
Source: PubMed Central journal article supplement (PMC8654833; doi:10.1038/s41598-021-02900-0), 2021-12-08
Supplement: 41598_2021_2900_MOESM1_ESM.pdf [file 41598_2021_2900_MOESM1_ESM.pdf]

Arnoux et al., Supplementary Figure S1

Binding experiments on the 11 most potent targets of BW.

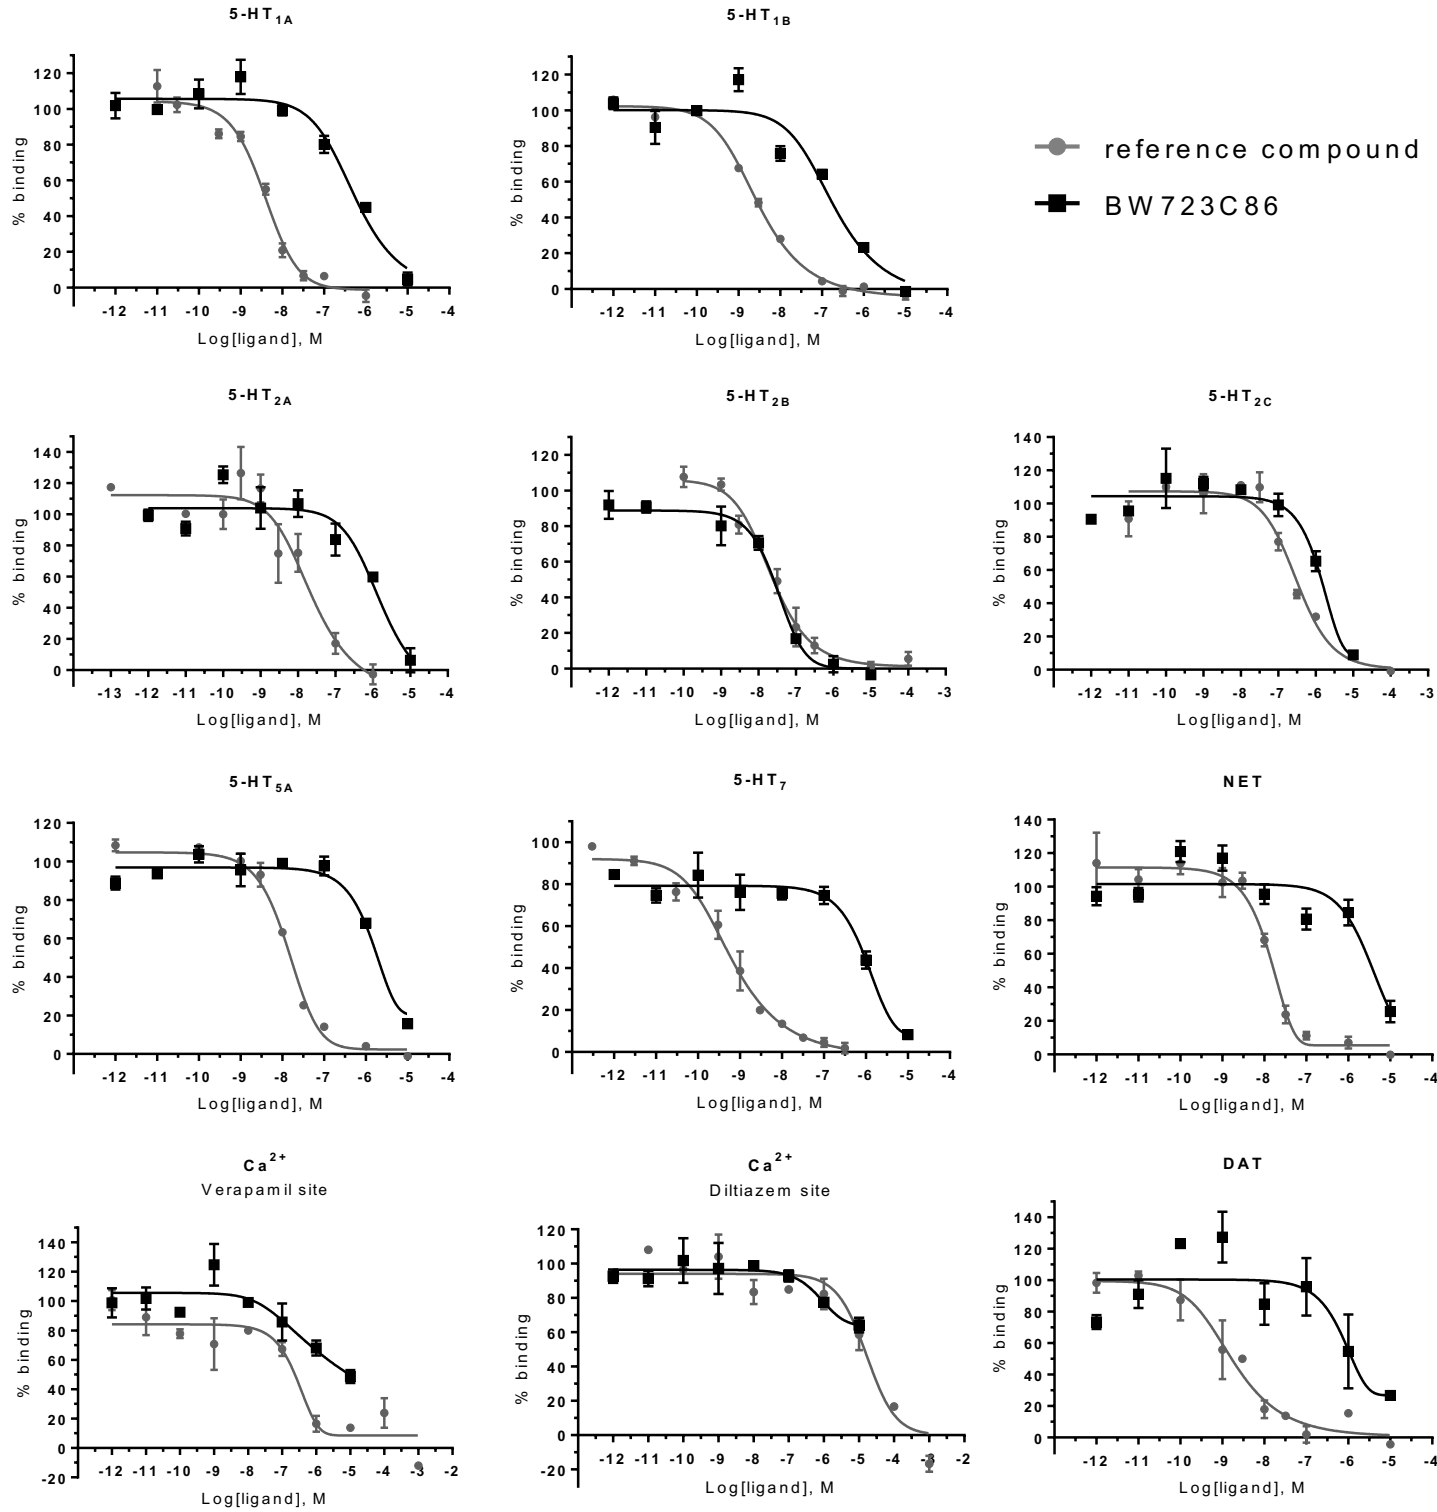

Supplementary Table S1 : Oligonucleotide primers used in our RT-qPCR experiments

| target  | 5'- forward -3'        | 5'- reverse -3'       |
|---------|------------------------|-----------------------|
| POL2    | GCTGGGAGACATAGCACCA    | TTACTCCCCTGCATGGTCTC  |
| TBP     | CCAATGACTCCTATGACCCCTA | CAGCCAAGATTACGGTAGAT  |
| Actin   | CAACCAAGTTCGCCATGGAT   | GGCTTTGCACATGCCGGAG   |
| Nox2    | ACACTGACCTCTGCTCCTGA   | AGGCATCTTGGA ACTCCTGC |
| YM1     | GAAGGACCATGGAGCAGCTT   | GGGGACCAATTCCA GTCTT  |
| HexB    | GGACTTCAGCATCGACCA CA  | GTAATATCGCCGAAACGCCTC |
| Iba1    | AGCTTTTGGA CTGCTGAAGG  | CAGCTCTAGGTGGGTCTTGG  |
| ApoE    | CTTCTGGGATTACCTGCGCT   | CTCCATCAGTGCCGTCAGTT  |
| Dap12   | TGACTCTGCTGATTGCCCTG   | GGCGACTCAGTCTCAGCAAT  |
| P2ry12  | ACCACCCCTGTTTTTCCAGTT  | AGCCTTGAGTGTCTGTAGGG  |
| Cx3cr1  | AGCTCACGACTGCCTTCTTC   | GGTGTTCATGGAGTTGGCG   |
| Tmem119 | ACCCAGAGCTGGTTCCATAG   | GAGTGACACAGAGTAGGCCA  |
| Lpl     | TGCCCGAGGTTCCACAAAT    | AGCAGTTCTCCGATGTCCAC  |
| Cst7    | AGTCCCATGT CAGCAAAGCC  | GTCGGCCGATTTTCACTC    |
| CD9     | TGGGGCTATACCCACAAGGA   | GCTTTGAGTGTTC CCGCTG  |

**POL2** : Polymerase 2 ; **TBP** : TATA box-binding protein ; **Nox2** : NADPH oxidase 2; **YM1** : Chitinase 3-like 3 ; **HexB** : Hexosaminidase B ; **ApoE** : Apolipoprotein E ; **P2ry12** : Purinergic Receptor P2Y12 ; **Cx3cr1** : CX3C chemokine receptor 1 ; **Tmem119** : Transmembrane Protein 119 ; **Lpl** : lipoprotein lipase ; **Cst7** : Cystatin-F

Supplementary Table S2 : Exhaustive list of the 106 targets in binding assays

| target list                                        |                                                                      |
|----------------------------------------------------|----------------------------------------------------------------------|
| 5-HT transporter                                   | inducible NOS                                                        |
| 5-HT1A                                             | IP (PGI2)                                                            |
| 5-HT1B                                             | KATP channel                                                         |
| 5-HT2A                                             | M1                                                                   |
| 5-HT2B                                             | M2                                                                   |
| 5-HT2C                                             | M3                                                                   |
| 5-HT3                                              | M4                                                                   |
| 5-HT5a                                             | MAO-A                                                                |
| 5-HT7                                              | MAO-B recombinant enzyme                                             |
| A1                                                 | MMP-1                                                                |
| A2A                                                | MMP-2                                                                |
| A2B                                                | MMP-3                                                                |
| A3                                                 | MMP-7                                                                |
| adenosine transporter                              | N neuronal $\alpha 4\beta 2$                                         |
| AMPA                                               | Na <sup>+</sup> channel (site 2)                                     |
| B1                                                 | NK1                                                                  |
| B2                                                 | NK2                                                                  |
| BB1                                                | NK3                                                                  |
| BZD                                                | NMDA                                                                 |
| Ca <sup>2+</sup> channel (L, dihydropyridine site) | NMU2                                                                 |
| Ca <sup>2+</sup> channel (L, diltiazem site)       | NOP (ORL1)                                                           |
| Ca <sup>2+</sup> channel (L, verapamil site)       | norepinephrine transporter                                           |
| Ca <sup>2+</sup> channel (N)                       | NTS1 (NT1)                                                           |
| CB1                                                | opioid (non-selective)                                               |
| CB2                                                | P2X                                                                  |
| CCK2 (CCKB)                                        | P2Y                                                                  |
| CGRP                                               | PAC1 (PACAP)                                                         |
| Cl <sup>-</sup> channel (GABA-gated)               | PCP                                                                  |
| constitutive NOS (endothelial)                     | PDE4A1A                                                              |
| COX1                                               | PDE4B1                                                               |
| COX2                                               | PDE4D2                                                               |
| CRF1                                               | PR                                                                   |
| D2L                                                | sigma (non-selective)                                                |
| D2S                                                | sigma 1                                                              |
| dopamine transporter                               | sigma 2                                                              |
| elastase                                           | SKCa channel                                                         |
| EP1                                                | sPLA2                                                                |
| EP4                                                | sst4                                                                 |
| ERK2 (P42mapkk)                                    | TNF- $\alpha$                                                        |
| ET1                                                | TRH1                                                                 |
| ETB                                                | tyrosine hydroxylase                                                 |
| GABA transaminase                                  | VPAC1 (VIP1)                                                         |
| GABA transporter                                   | xanthine oxidase / superoxide O <sub>2</sub> <sup>-</sup> scavenging |
| GABAA1                                             | Y1                                                                   |
| GABAB(1b)                                          | Y2                                                                   |
| GAL1                                               | $\alpha 1$                                                           |
| GAL2                                               | $\alpha 1D$                                                          |
| glycine (strychnine-insensitive)                   | $\alpha 2A$                                                          |
| glycine (strychnine-sensitive)                     | $\alpha 2C$                                                          |
| H1                                                 | $\beta 1$                                                            |
| H2                                                 | $\delta$ (DOP)                                                       |
| H3                                                 | $\kappa$ (KOP)                                                       |
| I2                                                 | $\mu$ (MOP)                                                          |
